# Supplementary material for: Radical anions of hypervalent silicon compounds: 1-substituted silatranes
Source: Royal Society of Chemistry journal article supplement (doi:10.1039/c4cp06046f), 2015-01-01
Supplement: c4cp06046f1.pdf [file c4cp06046f1.pdf]

## Electronic supplementary information

### Radical Anions of Hypervalent Silicon Compounds. 1-Substituted Silatranes

*E. F. Belogolova, T. I. Vakul'skaya, V. F. Sidorkin\**

A. E. Favorsky Irkutsk Institute of Chemistry, Siberian Branch of the Russian Academy of Sciences, Favorsky, 1, Irkutsk 664033, Russian Federation

\*E-mail: svf@irioc.irk.ru

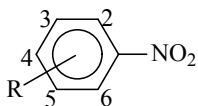

**Table S1** Experimental EPR hyperfine coupling constants (in Gauss) of the radical anions of the *para*- (**2a**), *meta*- (**2b**), and *ortho*- (**2c**) isomers of nitrophenoxysilatrane in DMF and acetonitrile solutions

| R                                                                                      | Solvent      | $a_N^{NO_2}$ | $a_{H(2)}$ | $a_{H(3)}$ | $a_{H(4)}$ | $a_{H(5)}$ | $a_{H(6)}$ |
|----------------------------------------------------------------------------------------|--------------|--------------|------------|------------|------------|------------|------------|
| <b>2a</b> <sup>•</sup> <i>p</i> -OSi(OCH <sub>2</sub> CH <sub>2</sub> ) <sub>3</sub> N | DMF          | 11.10        | 3.40       | 1.15       | -          | 1.15       | 3.40       |
|                                                                                        | acetonitrile | 11.80        | 3.30       | 1.10       | -          | 1.10       | 3.30       |
| <b>2b</b> <sup>•</sup> <i>m</i> -OSi(OCH <sub>2</sub> CH <sub>2</sub> ) <sub>3</sub> N | DMF          | 10.35        | 3.30       | 1.00       | 3.55       | -          | 3.30       |
|                                                                                        | acetonitrile | 10.50        | 3.25       | 1.0        | 3.50       | -          | 3.25       |
| <b>2c</b> <sup>•</sup> <i>o</i> -OSi(OCH <sub>2</sub> CH <sub>2</sub> ) <sub>3</sub> N | DMF          | 13.70        | 3.50       | 0.90       | 3.50       | 0.60       | -          |
|                                                                                        | acetonitrile | 14.00        | 3.40       | 0.90       | 3.40       | 0.60       | -          |

**Table S2** B3PW91/6-31+G(d,p)//B3PW91/6-31+G(d,p) Mulliken charges ( $q$ , e) in the neutral structure XSi(OCH<sub>2</sub>CH<sub>2</sub>)<sub>3</sub>N (X = C<sub>6</sub>H<sub>5</sub>), **1**, in its radical anion **1**<sup>•-</sup> and in complex **1**<sup>•-</sup>·K<sup>+</sup> in DME solution (C-PCM model)

|                | <b>1</b> | <b>1</b> <sup>•-</sup> | <b>1</b> <sup>•-</sup> ·K <sup>+</sup> |
|----------------|----------|------------------------|----------------------------------------|
| K              | -        | -                      | 0.96                                   |
| X <sup>a</sup> | -0.60    | -1.26                  | -1.57                                  |
| C1             | -1.75    | -1.55                  | -1.85                                  |
| Si             | 1.65     | 1.38                   | 1.57                                   |
| N              | -0.70    | -0.38                  | -0.46                                  |
| O1             | -0.57    | -0.60                  | -0.60                                  |
| O2             | -0.59    | -0.62                  | -0.60                                  |
| O3             | -0.63    | -0.64                  | -0.60                                  |

<sup>a</sup> The total charge on the phenyl ring.

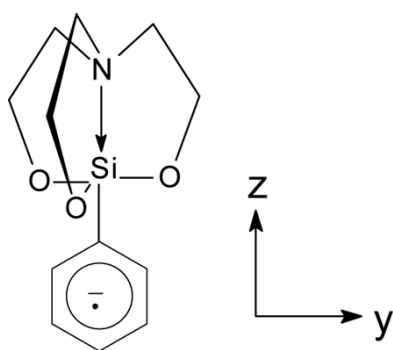

The phenyl moiety is oriented in the yz-plane with the silatranyl group along the z-axis.

**Table S3** Calculated isotropic g-factor and g-tensor components for the isolated  $\mathbf{1}^{\bullet}$  and complex  $\mathbf{1}^{\bullet} \cdot \mathbf{K}^+$  in DME solution (C-PCM model)<sup>a</sup>

|                                           | Method       | Basis set         | $g_{xx}$      | $g_{yy}$      | $g_{zz}$      | $g_{iso}$     |
|-------------------------------------------|--------------|-------------------|---------------|---------------|---------------|---------------|
| $\mathbf{1}^{\bullet}$                    | TPSSh        | IGLOIII           | 2.0018        | 2.0026        | 2.0032        | 2.0025        |
|                                           | B3LYP        | IGLOIII           | 2.0018        | 2.0027        | 2.0033        | 2.0026        |
|                                           | PBE0         | IGLOIII           | 2.0018        | 2.0026        | 2.0033        | 2.0026        |
|                                           | B3LYP        | EPRIII            | 2.0018        | 2.0027        | 2.0032        | 2.0026        |
|                                           | B3LYP        | TZVP              | 2.0018        | 2.0026        | 2.0033        | 2.0026        |
|                                           | B3LYP        | N07D              | 2.0018        | 2.0026        | 2.0031        | 2.0025        |
|                                           | <b>TPSSh</b> | <b>IGLOIII</b>    | <b>2.0018</b> | <b>2.0026</b> | <b>2.0033</b> | <b>2.0026</b> |
|                                           | <b>B3LYP</b> | <b>IGLOIII</b>    | <b>2.0018</b> | <b>2.0026</b> | <b>2.0034</b> | <b>2.0026</b> |
|                                           | <b>PBE0</b>  | <b>IGLOIII</b>    | <b>2.0018</b> | <b>2.0026</b> | <b>2.0034</b> | <b>2.0026</b> |
|                                           | <b>B3LYP</b> | <b>EPRIII</b>     | <b>2.0019</b> | <b>2.0026</b> | <b>2.0033</b> | <b>2.0026</b> |
|                                           | <b>B3LYP</b> | <b>TZVP</b>       | <b>2.0018</b> | <b>2.0026</b> | <b>2.0034</b> | <b>2.0026</b> |
|                                           | <b>B3LYP</b> | <b>aug-CCPVTZ</b> | <b>2.0019</b> | <b>2.0025</b> | <b>2.0033</b> | <b>2.0026</b> |
|                                           | <b>B3LYP</b> | <b>N07D</b>       | <b>2.0019</b> | <b>2.0026</b> | <b>2.0032</b> | <b>2.0026</b> |
| $\mathbf{1}^{\bullet} \cdot \mathbf{K}^+$ | TPSSh        | IGLOIII           | 2.0011        | 2.0024        | 2.0034        | 2.0023        |
|                                           | B3LYP        | IGLOIII           | 2.0011        | 2.0025        | 2.0034        | 2.0023        |
|                                           | PBE0         | IGLOIII           | 2.0013        | 2.0024        | 2.0035        | 2.0024        |
|                                           | B3LYP        | EPRIII            | 2.0011        | 2.0025        | 2.0035        | 2.0024        |
|                                           | B3LYP        | TZVP              | 2.0015        | 2.0024        | 2.0034        | 2.0024        |
|                                           | B3LYP        | N07D              | 2.0014        | 2.0024        | 2.0033        | 2.0024        |
|                                           | <b>TPSSh</b> | <b>IGLOIII</b>    | <b>2.0013</b> | <b>2.0018</b> | <b>2.0036</b> | <b>2.0022</b> |
|                                           | <b>B3LYP</b> | <b>IGLOIII</b>    | <b>2.0013</b> | <b>2.0018</b> | <b>2.0037</b> | <b>2.0023</b> |
|                                           | <b>PBE0</b>  | <b>IGLOIII</b>    | <b>2.0014</b> | <b>2.0017</b> | <b>2.0037</b> | <b>2.0023</b> |
|                                           | <b>B3LYP</b> | <b>EPRIII</b>     | <b>2.0013</b> | <b>2.0018</b> | <b>2.0037</b> | <b>2.0023</b> |
|                                           | <b>B3LYP</b> | <b>TZVP</b>       | <b>2.0017</b> | <b>2.0019</b> | <b>2.0035</b> | <b>2.0024</b> |
|                                           | <b>B3LYP</b> | <b>N07D</b>       | <b>2.0017</b> | <b>2.0018</b> | <b>2.0035</b> | <b>2.0023</b> |

<sup>a</sup> UB3PW91/6-31+G(d,p) and UMP2/6-31+G(d,p) (in bold) geometry optimization, C-PCM solvation model.

**Table S4** Experimental and calculated HFC constants  $a_{\text{H}}$  and the MAE parameter (in Gauss) for the radical anion of phenylsilatrane in DME solution<sup>a</sup>

| Optimization method | HFCC method | HFCC basis      | $a_{\text{H}(2,6)}$ | $a_{\text{H}(3,5)}$ | $a_{\text{H}(4)}$ | MAE         |
|---------------------|-------------|-----------------|---------------------|---------------------|-------------------|-------------|
|                     | Experiment  |                 | 2.62                | 0.85                | 8.38              |             |
| UB3PW91             | UB3PW91     | 6-31+G(d,p)     | -3.88               | -0.43               | -11.67            | 1.33        |
|                     | UPBE0       | N07D            | -3.45               | -0.24               | -10.41            | 0.98        |
|                     | UB3LYP      | N07D            | -3.49               | -0.55               | -10.74            | 0.94        |
|                     | UB3LYP      | 6-311++G(2d,2p) | -3.20               | -0.44               | -9.98             | 0.72        |
|                     | UB3LYP      | EPR3/IGLOIII    | -3.35               | -0.48               | -10.33            | 0.83        |
|                     |             |                 | <i>-3.38</i>        | <i>-0.44</i>        | <i>-10.54</i>     | <i>0.90</i> |
|                     | UB3LYP      | IGLOIII         | -3.09               | -0.46               | -9.42             | 0.55        |
|                     |             |                 | <i>-3.11</i>        | <i>-0.42</i>        | <i>-9.60</i>      | <i>0.61</i> |
|                     | UTPSSh      | IGLOIII         | -3.28               | -0.59               | -9.02             | 0.50        |
|                     |             |                 | <i>-3.24</i>        | <i>-0.57</i>        | <i>-9.04</i>      | <i>0.50</i> |
|                     | UB2PLYP     | IGLOIII         | -2.65               | -1.49               | -9.56             | 0.50        |
|                     |             | <i>-4.58</i>    | <i>0.85</i>         | <i>-14.54</i>       | <i>2.02</i>       |             |
|                     | UPBE0       | IGLOIII         | -3.49               | -0.25               | -10.48            | 1.01        |
|                     |             |                 | <i>-3.47</i>        | <i>-0.22</i>        | <i>-10.55</i>     | <i>1.03</i> |
| UMP2                | UB3PW91     | IGLOIII         | -3.37               | -0.40               | -10.04            | 0.82        |
|                     | UPBE0       | N07D            | -1.83               | -1.26               | -4.80             | 1.20        |
|                     | UB3LYP      | N07D            | -1.85               | -1.51               | -4.74             | 1.30        |
|                     | UB3LYP      | EPR3/IGLOIII    | -1.73               | -1.40               | -3.64             | 1.52        |
|                     | UB3LYP      | IGLOIII         | -1.70               | -1.31               | -3.86             | 1.46        |
|                     | UTPSSh      | IGLOIII         | -1.86               | -1.35               | -3.31             | 1.52        |
|                     | UB2PLYP     | IGLOIII         | -2.01               | -1.68               | -4.16             | 1.42        |
|                     | UB3PW91     | IGLOIII         | -1.92               | -1.35               | -4.62             | 1.23        |
|                     | UPBE0       | IGLOIII         | -1.92               | -1.27               | -4.99             | 1.13        |

<sup>a</sup> UB3PW91/6-31+G(d,p) and UMP2/6-31+G(d,p) geometry optimization, C-PCM and COSMO (italics) solvation models. The calculated values  $a_{\text{H}}$  for ortho-protons and  $a_{\text{H}}$  for meta-protons are averaged over the degenerate by energy states A and B (see Fig. 5).

**Table S5** UB3PW91/6-31+G(d,p) Mulliken charges ( $q$ , e) in the isomers of the neutral structures  $\text{XSi}(\text{OCH}_2\text{CH}_2)_3\text{N}$  ( $\text{X} = \text{NO}_2\text{C}_6\text{H}_4\text{O}$ ), **2**, and their radical anions, **2<sup>-•</sup>**, as well as their difference ( $\Delta q$ , e) in acetonitrile solution (C-PCM model)

|                        | $q$       | $q$                    | $\Delta q$                | $q$       | $q$                    | $\Delta q$                | $q$       | $q$                                | $\Delta q$                |
|------------------------|-----------|------------------------|---------------------------|-----------|------------------------|---------------------------|-----------|------------------------------------|---------------------------|
|                        | <b>2a</b> | <b>2a<sup>-•</sup></b> | <b>2a<sup>-•</sup>-2a</b> | <b>2b</b> | <b>2b<sup>-•</sup></b> | <b>2b<sup>-•</sup>-2b</b> | <b>2c</b> | <b>2c<sup>-•</sup><sup>a</sup></b> | <b>2c<sup>-•</sup>-2c</b> |
| $\text{NO}_2\text{Ph}$ | -0.30     | -1.21                  | -0.91                     | -0.25     | -1.27                  | -1.01                     | -0.22     | -1.22                              | -0.99                     |
|                        |           |                        |                           |           |                        |                           |           | <i>-1.01</i>                       | <i>-0.78</i>              |
| $\text{X}^b$           | -0.81     | -1.76                  | -0.95                     | -0.78     | -1.80                  | -1.02                     | -0.71     | -1.71                              | -1.00                     |
|                        |           |                        |                           |           |                        |                           |           | <i>-1.62</i>                       | <i>-0.91</i>              |
| O                      | -0.50     | -0.55                  | -0.05                     | -0.53     | -0.53                  | -0.01                     | -0.49     | -0.49                              | 0.00                      |
|                        |           |                        |                           |           |                        |                           |           | <i>-0.61</i>                       | <i>-0.12</i>              |
| Si                     | 2.20      | 2.19                   | -0.01                     | 2.20      | 2.25                   | 0.05                      | 2.16      | 2.12                               | -0.03                     |
|                        |           |                        |                           |           |                        |                           |           | <i>2.09</i>                        | <i>-0.07</i>              |
| N                      | -0.94     | -0.89                  | 0.05                      | -0.91     | -0.89                  | 0.03                      | -0.95     | -0.90                              | 0.06                      |
|                        |           |                        |                           |           |                        |                           |           | <i>-0.35</i>                       | <i>0.60</i>               |
| O11                    | -0.68     | -0.69                  | -0.01                     | -0.69     | -0.69                  | 0.00                      | -0.71     | -0.68                              | 0.03                      |
|                        |           |                        |                           |           |                        |                           |           | <i>-0.81</i>                       | <i>-0.10</i>              |
| O12                    | -0.70     | -0.71                  | -0.01                     | -0.69     | -0.71                  | -0.02                     | -0.71     | -0.71                              | 0.00                      |
|                        |           |                        |                           |           |                        |                           |           | <i>-0.57</i>                       | <i>0.15</i>               |
| O13                    | -0.69     | -0.70                  | -0.01                     | -0.72     | -0.71                  | 0.01                      | -0.72     | -0.70                              | 0.02                      |
|                        |           |                        |                           |           |                        |                           |           | <i>-0.77</i>                       | <i>-0.06</i>              |

<sup>a</sup> The charge values are given in normal type for **2c<sup>-•</sup>**(Si←N) isomer and in italics for **2c<sup>-•</sup>**(Si←O) isomer. <sup>b</sup> The total charge over the  $\text{NO}_2\text{C}_6\text{H}_4\text{O}$  fragment.

**Table S6** Experimental and calculated hyperfine coupling constants as well as the MAE parameter (in Gauss) for the *para*-isomer of  $[\text{NO}_2\text{C}_6\text{H}_4\text{OSi}(\text{OCH}_2\text{CH}_2)_3\text{N}]^-$  in acetonitrile solution. Geometry optimization was carried out at the UB3PW91/6-31+G(d,p) and UMP2/6-31+G(d,p) (in bold) levels of theory (C-PCM and COSMO (in italics) solvation models)

| HFCC method                           | $a_{\text{N}}^{\text{NO}_2}$ | $a_{\text{H}(2)}$ | $a_{\text{H}(3)}$ | $a_{\text{H}(5)}$ | $a_{\text{H}(6)}$ | MAE         |
|---------------------------------------|------------------------------|-------------------|-------------------|-------------------|-------------------|-------------|
| Experiment                            | 11.80                        | 3.30              | 1.10              | 1.10              | 3.30              | 0.00        |
| C-PCM TPSSh/IGLOIII                   | 8.24                         | -3.46             | 1.20              | 1.20              | -3.46             | 0.81        |
| C-PCM PBE0/IGLOIII                    | 8.16                         | -4.05             | 1.80              | 1.80              | -4.05             | 1.30        |
| C-PCM B3PW91/IGLOIII                  | 6.96                         | -3.79             | 1.53              | 1.53              | -3.79             | 1.33        |
| C-PCM B3LYP/IGLOIII                   | 7.74                         | -3.46             | 1.33              | 1.33              | -3.46             | 0.97        |
| C-PCM B3LYP/EPRIII <sup>a</sup>       | 8.02                         | -3.78             | 1.47              | 1.47              | -3.78             | 1.09        |
| C-PCM B3LYP/6-311++G(2d,2p)           | 7.40                         | -3.64             | 1.40              | 1.40              | -3.64             | 1.13        |
| C-PCM B2PLYP/IGLOIII                  | -8.05                        | -1.62             | -0.68             | -0.68             | -1.62             | 1.59        |
| C-PCM B3LYP/N07D(5D)                  | 12.06                        | -3.96             | 1.52              | 1.52              | -3.96             | 0.48        |
| <i>COSMO TPSSh/IGLOIII</i>            | <i>8.61</i>                  | <i>-3.43</i>      | <i>1.19</i>       | <i>1.19</i>       | <i>-3.43</i>      | <i>0.72</i> |
| <i>COSMO B3LYP/IGLOIII</i>            | <i>8.31</i>                  | <i>-3.50</i>      | <i>1.35</i>       | <i>1.35</i>       | <i>-3.50</i>      | <i>0.88</i> |
| <i>COSMO B3LYP/EPRIII<sup>a</sup></i> | <i>8.56</i>                  | <i>-3.83</i>      | <i>1.49</i>       | <i>1.49</i>       | <i>-3.83</i>      | <i>1.02</i> |
| <i>COSMO B2PLYP/IGLOIII</i>           | <i>16.91</i>                 | <i>-6.97</i>      | <i>4.51</i>       | <i>4.51</i>       | <i>-6.97</i>      | <i>3.85</i> |
| <b>C-PCM TPSSh/IGLOIII</b>            | <b>15.94</b>                 | <b>-2.19</b>      | <b>0.81</b>       | <b>0.81</b>       | <b>-2.19</b>      | <b>1.39</b> |
| <b>C-PCM B3LYP/IGLOIII</b>            | <b>15.75</b>                 | <b>-2.20</b>      | <b>0.85</b>       | <b>0.85</b>       | <b>-2.20</b>      | <b>1.33</b> |
| <b>C-PCM B3LYP/EPRIII<sup>a</sup></b> | <b>15.99</b>                 | <b>-2.41</b>      | <b>0.94</b>       | <b>0.94</b>       | <b>-2.41</b>      | <b>1.26</b> |
| <b>C-PCM B3LYP/6-311++G(2d,2p)</b>    | <b>15.16</b>                 | <b>-2.33</b>      | <b>0.90</b>       | <b>0.90</b>       | <b>-2.33</b>      | <b>1.14</b> |
| <b>C-PCM B3LYP/N07D (6D)</b>          | <b>17.57</b>                 | <b>-2.53</b>      | <b>0.97</b>       | <b>0.97</b>       | <b>-2.53</b>      | <b>1.51</b> |
| <b>C-PCM PBE0/IGLOIII</b>             | <b>16.23</b>                 | <b>-2.57</b>      | <b>1.14</b>       | <b>1.14</b>       | <b>-2.57</b>      | <b>1.19</b> |
| <b>C-PCM B3PW91/IGLOIII</b>           | <b>14.84</b>                 | <b>-2.42</b>      | <b>0.99</b>       | <b>0.99</b>       | <b>-2.42</b>      | <b>1.01</b> |
| <b>C-PCM B2PLYP/IGLOIII</b>           | <b>16.86</b>                 | <b>-0.31</b>      | <b>-1.10</b>      | <b>-1.10</b>      | <b>-0.31</b>      | <b>2.21</b> |

<sup>a</sup> The IGLOIII basis set was used for Si in HFCC calculations.

**Table S7** Experimental and calculated hyperfine coupling constants as well as the MAE parameter (in Gauss) for the *ortho*-isomers  $2\mathbf{c}^{\bullet}(\text{Si}\leftarrow\text{N})$  and  $2\mathbf{c}^{\bullet}(\text{Si}\leftarrow\text{O})$  of  $[\text{NO}_2\text{C}_6\text{H}_4\text{OSi}(\text{OCH}_2\text{CH}_2)_3\text{N}]^{\bullet-}$  in acetonitrile solution. Geometry optimization was carried out at the UB3PW91/6-31+G(d,p) and UMP2/6-31+G(d,p) (in bold) levels of theory (C-PCM and COSMO (in italics) solvation models)

| Molecule                                             | HFCC method                           | $a_{\text{N}}^{\text{NO}_2}$ | $a_{\text{H}(2)}$ | $a_{\text{H}(3)}$ | $a_{\text{H}(4)}$ | $a_{\text{H}(5)}$ | MAE         |
|------------------------------------------------------|---------------------------------------|------------------------------|-------------------|-------------------|-------------------|-------------------|-------------|
| $2\mathbf{c}^{\bullet}(\text{Si}\leftarrow\text{N})$ | Experiment                            | 14.00                        | 3.40              | 0.90              | 3.40              | 0.60              | 0.00        |
|                                                      | C-PCM TPSSh/IGLOIII                   | 7.74                         | -3.79             | 1.25              | -3.79             | 0.71              | 1.50        |
|                                                      | C-PCM B3LYP/IGLOIII                   | 7.35                         | -3.69             | 1.38              | -3.69             | 0.89              | 1.60        |
|                                                      | C-PCM B3LYP/N07D                      | 11.48                        | -4.18             | 1.57              | -4.18             | 1.02              | 1.03        |
|                                                      | <i>COSMO TPSSh/IGLOIII</i>            | <i>7.90</i>                  | <i>-3.81</i>      | <i>1.21</i>       | <i>-3.81</i>      | <i>0.66</i>       | <i>1.46</i> |
|                                                      | <i>COSMO B3LYP/IGLOIII</i>            | <i>7.70</i>                  | <i>-3.79</i>      | <i>1.38</i>       | <i>-3.79</i>      | <i>0.87</i>       | <i>1.56</i> |
|                                                      | <b>C-PCM TPSSh/IGLOIII</b>            | <b>27.97</b>                 | <b>-0.33</b>      | <b>1.59</b>       | <b>-0.33</b>      | <b>-0.13</b>      | <b>4.25</b> |
|                                                      | <b>C-PCM B3LYP/IGLOIII</b>            | <b>27.49</b>                 | <b>-0.36</b>      | <b>1.31</b>       | <b>-0.36</b>      | <b>-0.09</b>      | <b>4.10</b> |
|                                                      | <b>C-PCM B3LYP/N07D</b>               | <b>29.13</b>                 | <b>-0.36</b>      | <b>1.29</b>       | <b>-0.36</b>      | <b>-0.08</b>      | <b>4.43</b> |
|                                                      | <b>C-PCM B3LYP/EPRIII<sup>a</sup></b> | <b>27.61</b>                 | <b>-0.38</b>      | <b>1.38</b>       | <b>-0.38</b>      | <b>-0.09</b>      | <b>4.13</b> |
|                                                      | <b>C-PCM B3LYP/6-311++G(2d,2p)</b>    | <b>26.35</b>                 | <b>-0.36</b>      | <b>1.25</b>       | <b>-0.36</b>      | <b>-0.08</b>      | <b>3.86</b> |
|                                                      | <b>C-PCM PBE0/IGLOIII</b>             | <b>27.82</b>                 | <b>-0.38</b>      | <b>1.32</b>       | <b>-0.38</b>      | <b>-0.10</b>      | <b>4.16</b> |
|                                                      | <b>C-PCM B3PW91/IGLOIII</b>           | <b>26.56</b>                 | <b>-0.37</b>      | <b>1.32</b>       | <b>-0.37</b>      | <b>-0.10</b>      | <b>3.91</b> |
|                                                      | <b>C-PCM B2PLYP/IGLOIII</b>           | <b>28.93</b>                 | <b>-0.34</b>      | <b>1.23</b>       | <b>-0.34</b>      | <b>-0.17</b>      | <b>4.36</b> |
| $2\mathbf{c}^{\bullet}(\text{Si}\leftarrow\text{O})$ | C-PCM TPSSh/IGLOIII                   | 10.30                        | -3.34             | 1.16              | -3.34             | 0.75              | 0.85        |
|                                                      | C-PCM B3LYP/IGLOIII                   | 9.61                         | -3.25             | 1.23              | -3.25             | 0.89              | 1.06        |
|                                                      | C-PCM B3LYP/N07D                      | 14.07                        | -3.70             | 1.40              | -3.70             | 1.03              | 0.32        |
|                                                      | <i>COSMO TPSSh/IGLOIII</i>            | <i>10.57</i>                 | <i>-3.28</i>      | <i>1.14</i>       | <i>-3.28</i>      | <i>0.75</i>       | <i>0.81</i> |
|                                                      | <i>COSMO B3LYP/IGLOIII</i>            | <i>10.16</i>                 | <i>-3.27</i>      | <i>1.25</i>       | <i>-3.27</i>      | <i>0.92</i>       | <i>0.96</i> |
|                                                      | <b>C-PCM TPSSh/IGLOIII</b>            | <b>23.89</b>                 | <b>-1.38</b>      | <b>1.01</b>       | <b>-1.38</b>      | <b>0.18</b>       | <b>2.89</b> |
|                                                      | <b>C-PCM B3LYP/IGLOIII</b>            | <b>23.94</b>                 | <b>-1.37</b>      | <b>0.92</b>       | <b>-1.37</b>      | <b>0.24</b>       | <b>2.88</b> |
|                                                      | <b>C-PCM B3LYP/N07D</b>               | <b>25.47</b>                 | <b>-1.54</b>      | <b>0.96</b>       | <b>-1.54</b>      | <b>0.30</b>       | <b>3.11</b> |
|                                                      | <b>C-PCM B3LYP/EPRIII<sup>a</sup></b> | <b>23.99</b>                 | <b>-1.50</b>      | <b>0.98</b>       | <b>-1.50</b>      | <b>0.27</b>       | <b>2.84</b> |
|                                                      | <b>C-PCM B3LYP/6-311++G(2d,2p)</b>    | <b>22.90</b>                 | <b>-1.44</b>      | <b>0.91</b>       | <b>-1.44</b>      | <b>0.27</b>       | <b>2.63</b> |
|                                                      | <b>C-PCM PBE0/IGLOIII</b>             | <b>24.26</b>                 | <b>-1.58</b>      | <b>1.06</b>       | <b>-1.58</b>      | <b>0.38</b>       | <b>2.86</b> |
|                                                      | <b>C-PCM B3PW91/IGLOIII</b>           | <b>23.04</b>                 | <b>-1.50</b>      | <b>0.99</b>       | <b>-1.50</b>      | <b>0.30</b>       | <b>2.65</b> |
|                                                      | <b>C-PCM B2PLYP/IGLOIII</b>           | <b>25.87</b>                 | <b>-0.36</b>      | <b>-0.19</b>      | <b>-0.36</b>      | <b>-0.83</b>      | <b>3.78</b> |

<sup>a</sup> The IGLOIII basis set was used for Si in HFCC calculations.

**Table S8** Experimental and calculated<sup>a</sup> g-values for the radical anions of nitrophenoxysilatrane in acetonitrile solution

|                              | method                  | $g_{\text{iso}}$ |
|------------------------------|-------------------------|------------------|
| <b>2a<sup>-•</sup></b>       | Exp.                    | 2.0054           |
|                              | UTPSSh/IGLOIII//UB3PW91 | 2.0049           |
|                              | UPBE0/IGLOIII//UB3PW91  | 2.0051           |
|                              | UPBE0/TZVP//UB3PW91     | 2.0051           |
|                              | UB3LYP/IGLOIII//UB3PW91 | 2.0051           |
|                              | UB3LYP/EPRIII//UB3PW91  | 2.0051           |
|                              | UB3LYP/TZVP//UB3PW91    | 2.0052           |
|                              | UB3LYP/N07D//UB3PW91    | 2.0048           |
|                              | UTPSSh/IGLOIII//UMP2    | 2.0052           |
|                              | UPBE0/IGLOIII//UMP2     | 2.0054           |
|                              | UB3LYP/IGLOIII//UMP2    | 2.0054           |
|                              | UB3LYP/EPRIII//UMP2     | 2.0053           |
|                              | UB3LYP/TZVP//UMP2       | 2.0054           |
|                              | UB3LYP/N07D//UMP2       | 2.0050           |
| <b>2b<sup>-•</sup></b>       | Exp.                    | 2.0063           |
|                              | UTPSSh/IGLOIII//UB3PW91 | 2.0048           |
|                              | UB3LYP/IGLOIII//UB3PW91 | 2.0050           |
|                              | UB3LYP/TZVP//UB3PW91    | 2.0051           |
|                              | UB3LYP/N07D//UB3PW91    | 2.0047           |
|                              | UTPSSh/IGLOIII          | 2.0050           |
|                              | UB3LYP/IGLOIII          | 2.0052           |
|                              | UB3LYP/TZVP             | 2.0053           |
| UB3LYP/N07D                  | 2.0049                  |                  |
| <b>2c<sup>-•</sup></b>       | Exp.                    | 2.0068           |
| <b>2c<sup>-•</sup>(Si←N)</b> | UTPSSh/IGLOIII//UB3PW91 | 2.0049           |
|                              | UB3LYP/IGLOIII//UB3PW91 | 2.0052           |
|                              | UB3LYP/TZVP//UB3PW91    | 2.0052           |
|                              | UB3LYP/N07D//UB3PW91    | 2.0049           |
|                              | UTPSSh/IGLOIII//UMP2    | 2.0059           |
|                              | UB3LYP/IGLOIII//UMP2    | 2.0062           |
|                              | UB3LYP/TZVP//UMP2       | 2.0062           |
|                              | UB3LYP/N07D//UMP2       | 2.0057           |
| <b>2c<sup>-•</sup>(Si←O)</b> | UTPSSh/IGLOIII//UB3PW91 | 2.0048           |
|                              | UB3LYP/IGLOIII//UB3PW91 | 2.0051           |
|                              | UB3LYP/TZVP//UB3PW91    | 2.0051           |
|                              | UB3LYP/N07D//UB3PW91    | 2.0048           |
|                              | UTPSSh/IGLOIII//UMP2    | 2.0053           |
|                              | UB3LYP/IGLOIII//UMP2    | 2.0056           |

---

|                   |        |
|-------------------|--------|
| UB3LYP/TZVP//UMP2 | 2.0056 |
| UB3LYP/N07D//UMP2 | 2.0053 |

---

<sup>a</sup> Geometry optimization was carried out at the UB3PW91/6-31+G(d,p) and UMP2/6-31+G(d,p) levels of theory in acetonitrile solution (C-PCM model).
